# Supplementary material
Source: Royal Society of Chemistry journal article supplement (doi:10.1039/d6ta01989g)
Supplement: d6ta01989g1.pdf [file d6ta01989g1.pdf]

## Supporting Information

### **A synergistic strategy of hierarchical pore engineering and ligand functionalization: Modulating Ni sites in Ce-UiO-66 for dicyclopentadiene hydrogenation under mild conditions**

Yunqi Zhang, Tianyu Zhang, Yifei Ye, Xinmeng Xu, Wenjuan Xiang, Xiubing Huang\*, Ge Wang\*  
Beijing Key Laboratory of Function Materials for Molecule & Structure Construction, School of Materials Science and Engineering, University of Science and Technology Beijing, Beijing 100083, PR China

\* Corresponding authors: xiubinghuang@ustb.edu.cn (X. Huang), gewang@ustb.edu.cn (G. Wang).

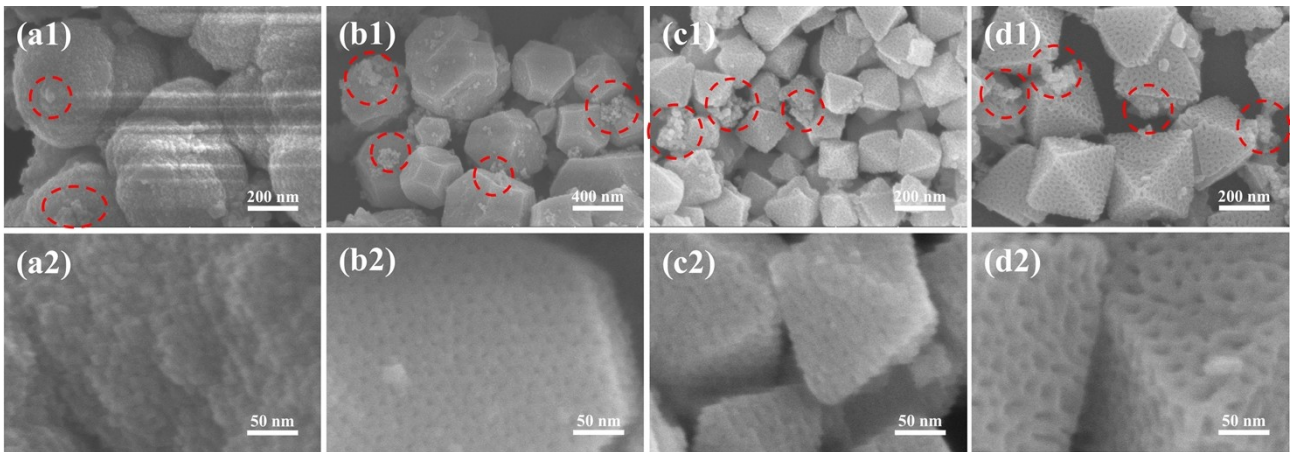

**Fig. S1.** SEM images of (a) 4Ni/HP-U(Ce)-NH<sub>2</sub>, (b) 4Ni/HP-U(Ce)-H, (c) 4Ni/HP-U(Ce)-NO<sub>2</sub>, (d) 4Ni/HP-U(Ce)-Br (10-0).

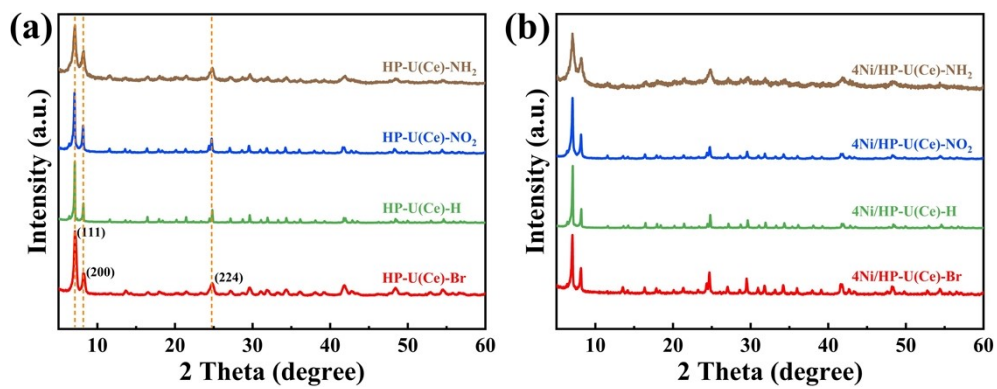

**Fig. S2.** XRD patterns of (a) HP-U(Ce)-X, (b) 4Ni/HP-U(Ce)-X.

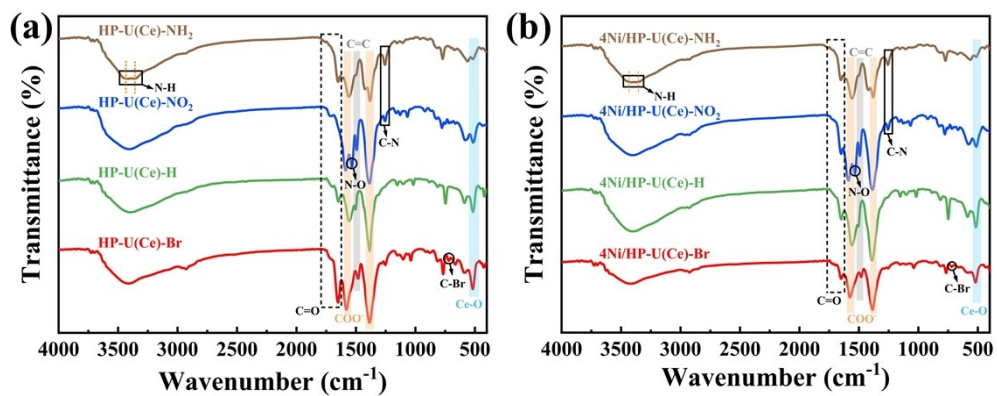

**Fig. S3.** FT-IR spectra of (a) HP-U(Ce)-X, (b) 4Ni/HP-U(Ce)-X.

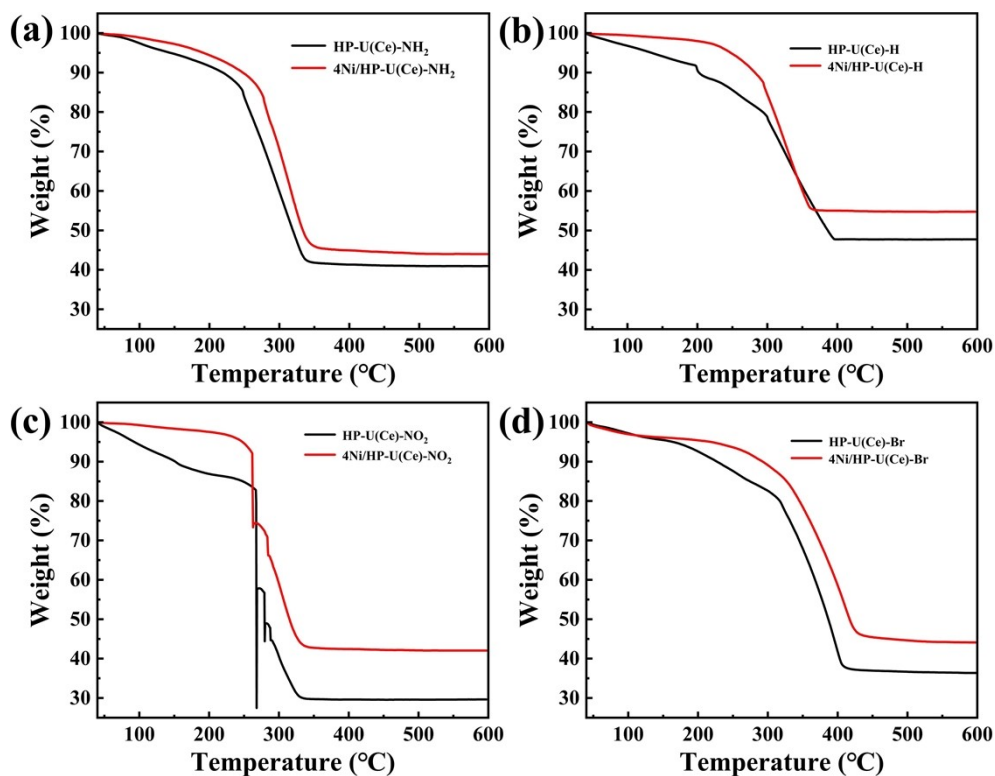

**Fig. S4.** TG curves of (a) HP-U(Ce)-NH<sub>2</sub>, (b) HP-U(Ce)-H, (c) HP-U(Ce)-NO<sub>2</sub>, (d) HP-U(Ce)-Br (10-0) and corresponding Ni-loaded samples.

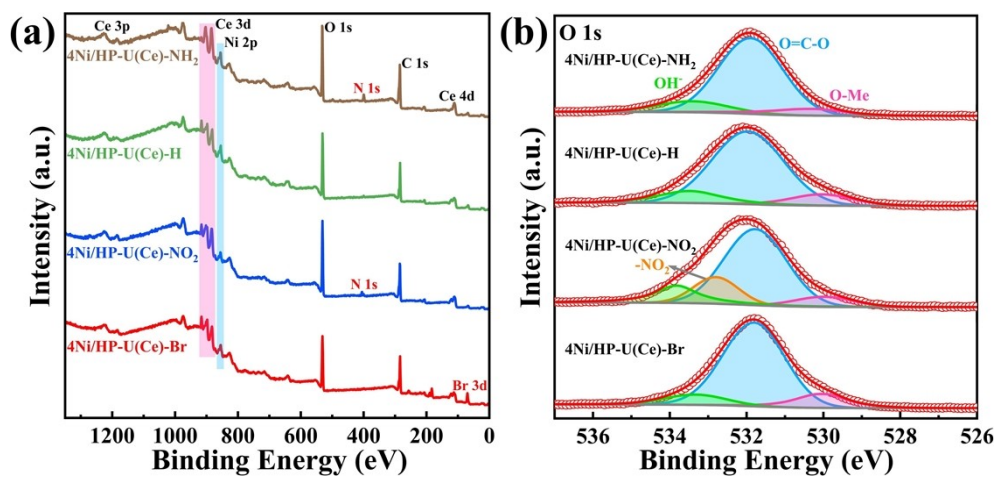

**Fig. S5.** (a) Full survey and (b) O 1s XPS spectra of 4Ni/HP-U(Ce)-X.

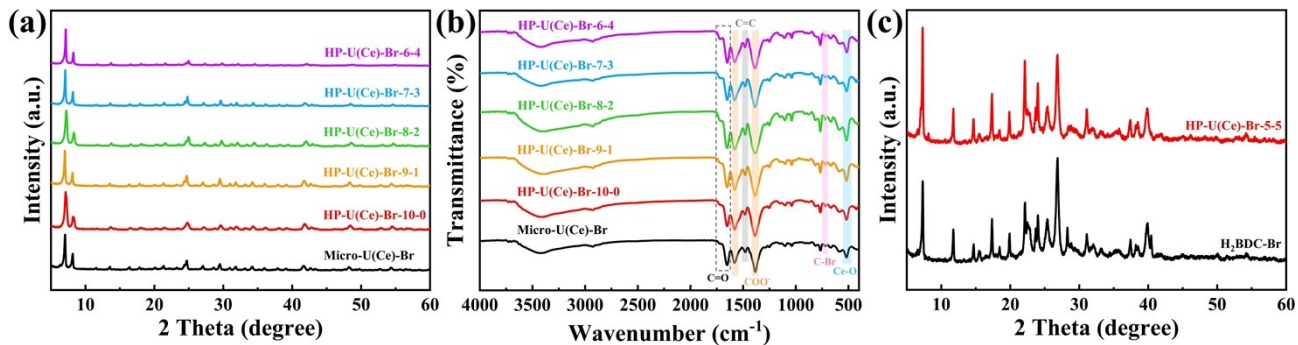

**Fig. S6.** (a) XRD patterns and (b) FT-IR spectra of Micro-U(Ce)-Br and HP-U(Ce)-Br-*x-y*. (c) XRD pattern of HP-U(Ce)-Br-5-5.

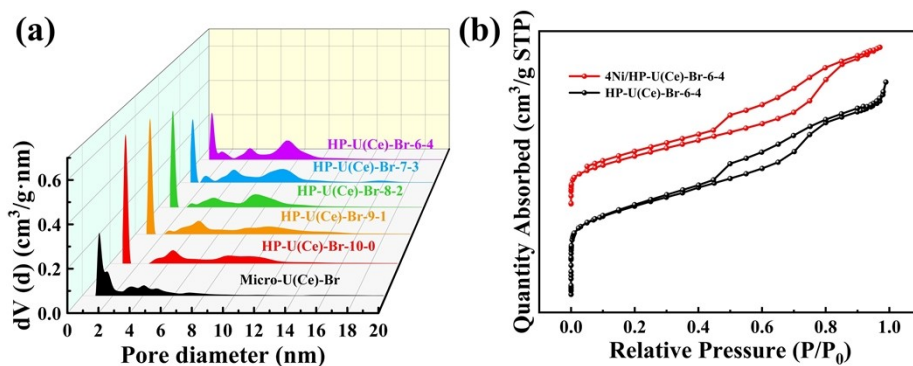

**Fig. S7.** (a) Pore size distributions of Micro-U(Ce)-Br and HP-U(Ce)-Br-*x-y*, (b) N<sub>2</sub> adsorption-desorption isotherm of 4Ni/HP-U(Ce)-Br-6-4

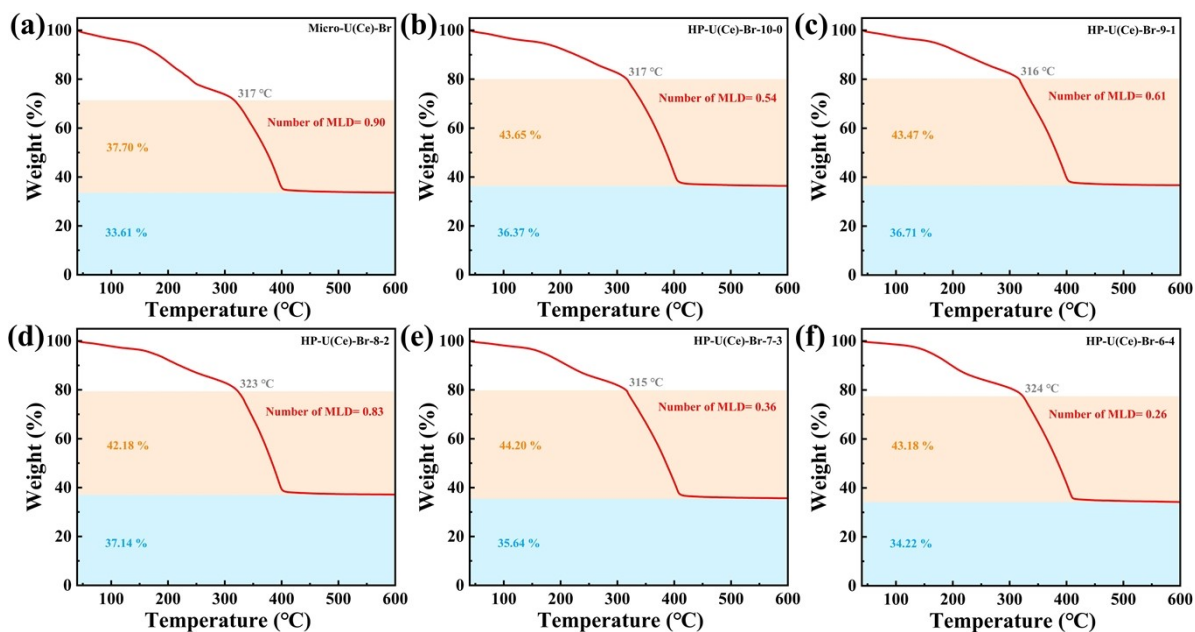

**Fig. S8.** TG curves of (a) Micro-U(Ce)-Br, (b) HP-U(Ce)-Br-10-0, (c) HP-U(Ce)-Br-9-1, (d) HP-U(Ce)-Br-8-2, (e) HP-U(Ce)-Br-7-3, (f) HP-U(Ce)-Br-6-4.

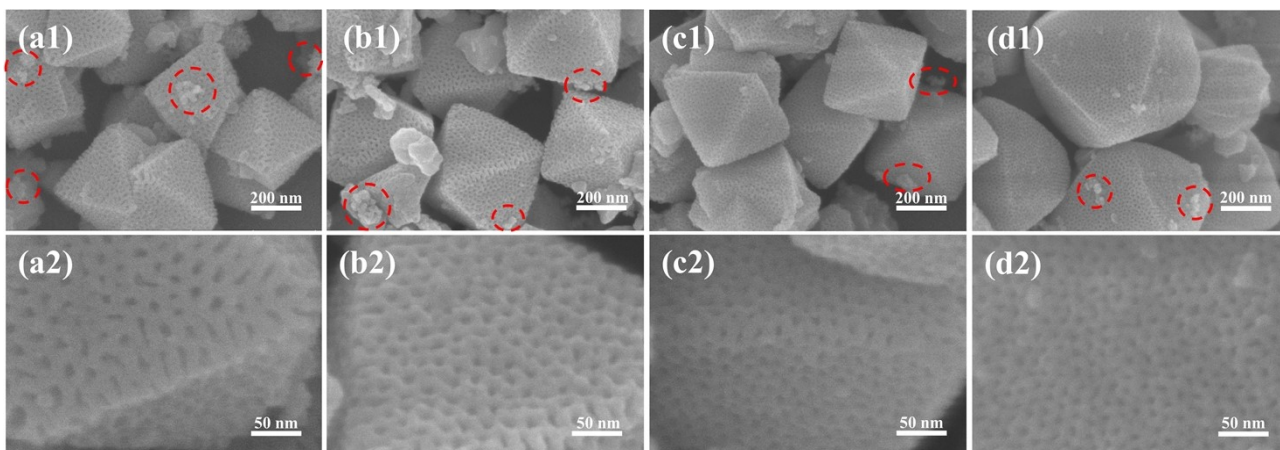

**Fig. S9.** SEM images of (a) 4Ni/HP-U(Ce)-Br-9-1, (b) 4Ni/HP-U(Ce)-Br-8-2, (c) 4Ni/HP-U(Ce)-Br-7-3, (d) 4Ni/HP-U(Ce)-Br-6-4.

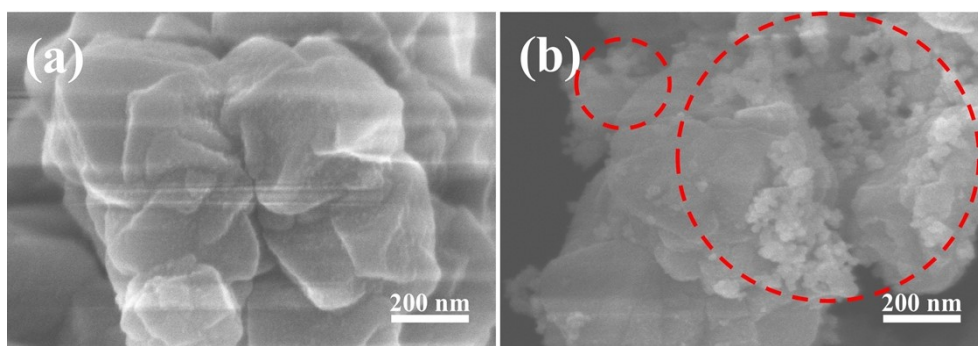

**Fig. S10.** SEM images of (a) Micro-U(Ce)-Br and (b) 4Ni/Micro-U(Ce)-Br.

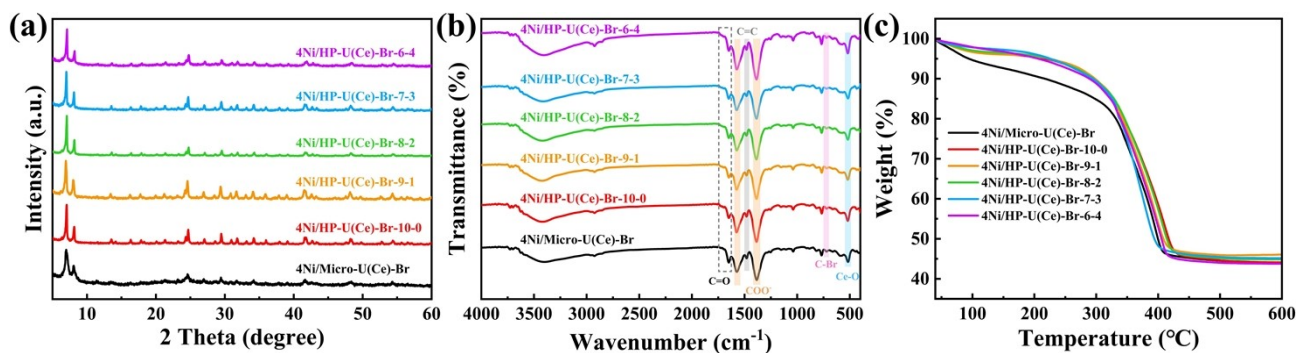

**Fig. S11.** (a) XRD patterns, (b) FT-IR spectra and (c) TG curves of 4Ni/Micro-U(Ce)-Br and 4Ni/HP-U(Ce)-Br- $x$ - $y$ .

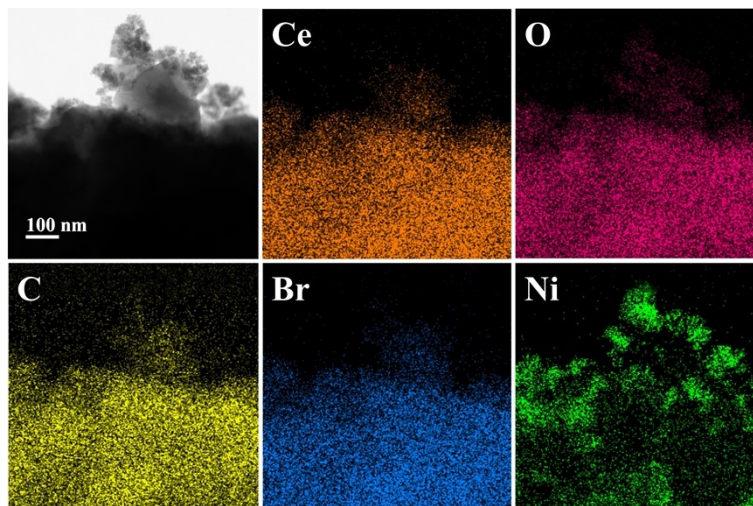

**Fig. S12.** HAADF-STEM image with EDX elemental mapping images of 4Ni/Micro-U(Ce)-Br.

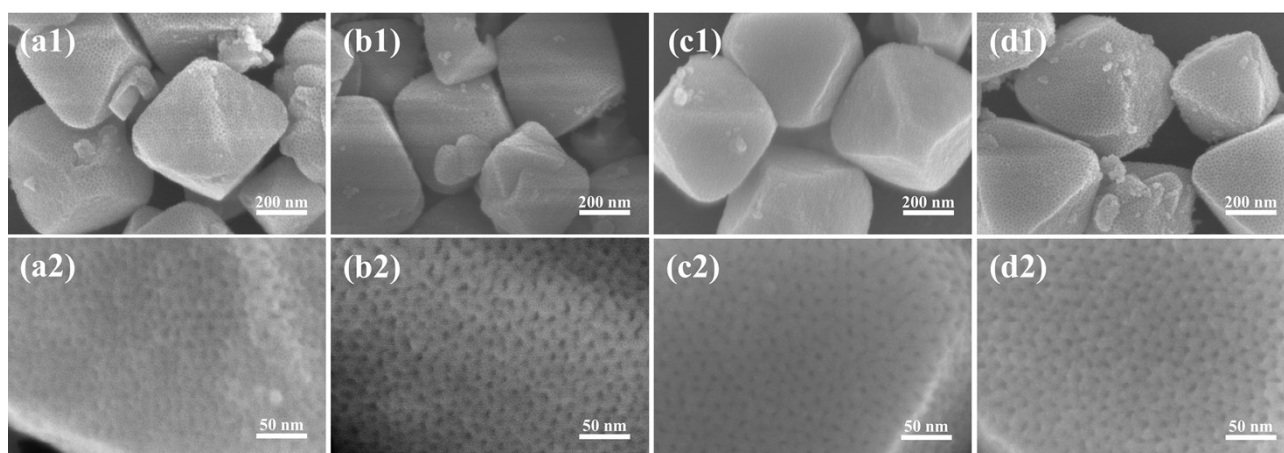

**Fig. S13.** SEM images of (a) 1Ni/HP-U(Ce)-Br-6-4, (b) 2Ni/HP-U(Ce)-Br-6-4, (c) 3Ni/HP-U(Ce)-Br-6-4, (d) 5Ni/HP-U(Ce)-Br-6-4.

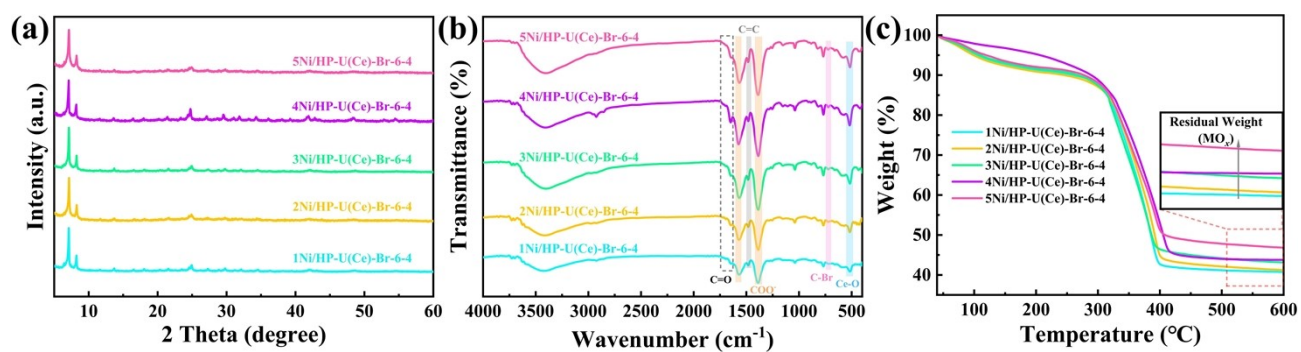

**Fig. S14.** (a) XRD patterns, (b) FT-IR spectra and (c) TG curves of zNi/HP-U(Ce)-Br-6-4.

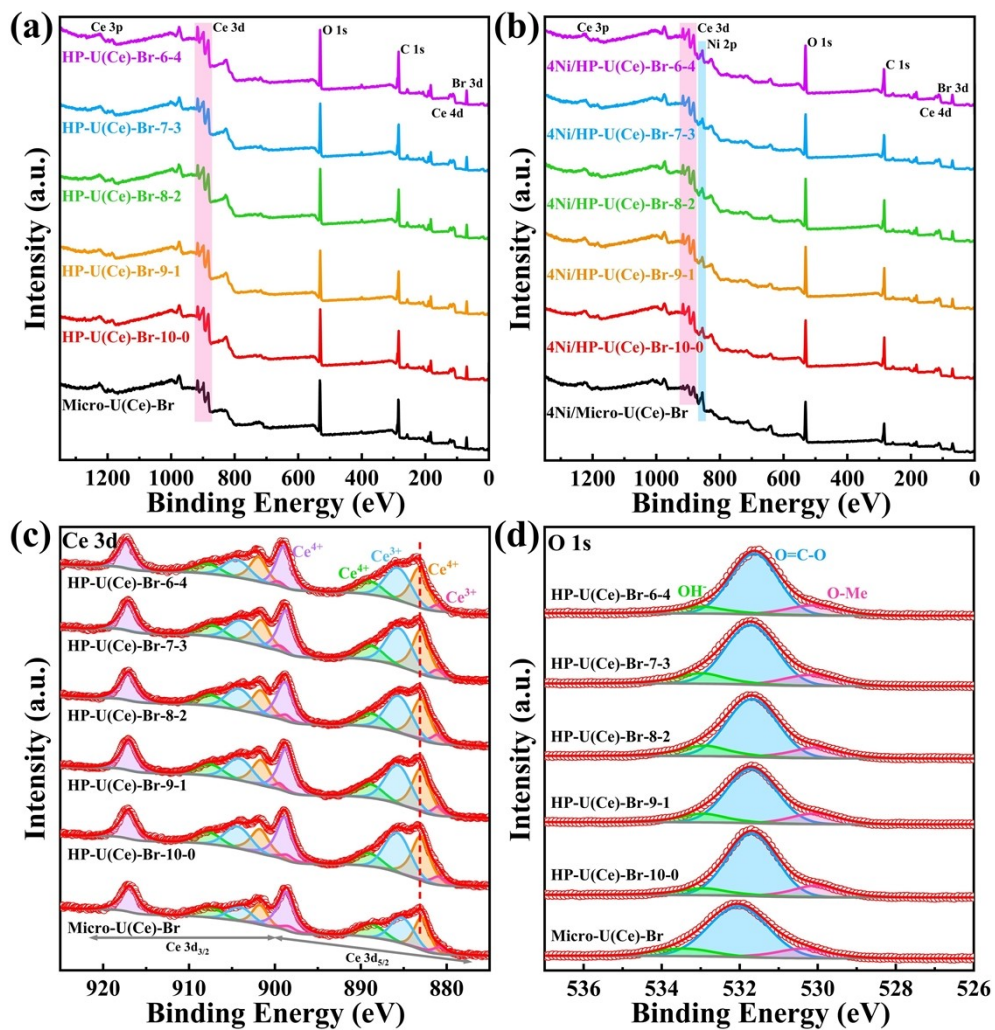

**Fig. S15.** Full survey XPS spectra of (a) Micro-U(Ce)-Br and HP-U(Ce)-Br- $x$ - $y$ , (b) 4Ni/Micro-U(Ce)-Br and 4Ni/HP-U(Ce)-Br- $x$ - $y$ . (c) Ce 3d, (d) O 1s XPS spectra of Micro-U(Ce)-Br and HP-U(Ce)-Br- $x$ - $y$ .

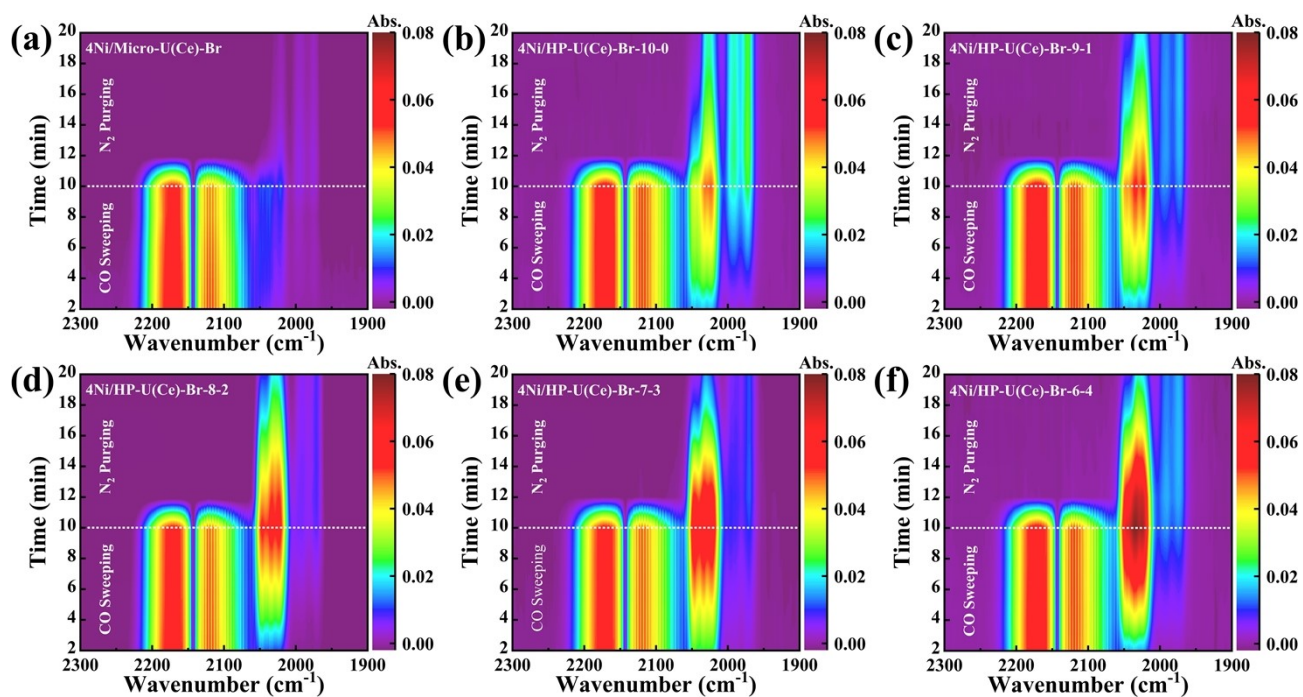

**Fig. S16.** In-situ CO-DRIFTS spectra of (a) 4Ni/Micro-U(Ce)-Br, (b) 4Ni/HP-U(Ce)-Br-10-0, (c) 4Ni/HP-U(Ce)-Br-9-1, (d) 4Ni/HP-U(Ce)-Br-8-2, (e) 4Ni/HP-U(Ce)-Br-7-3, (f) 4Ni/HP-U(Ce)-Br-6-4.

**Table S1.** Pore parameters from nitrogen sorption isotherms of samples.

| Samples                  | $A_{\text{BET}}$<br>( $\text{m}^2/\text{g}$ ) | $V_{\text{total}}$<br>( $\text{cm}^3/\text{g}$ ) | $A_{\text{micro.}}$<br>( $\text{m}^2/\text{g}$ ) | $V_{\text{micro.}}$<br>( $\text{cm}^3/\text{g}$ ) | $A_{\text{meso.}}$<br>( $\text{m}^2/\text{g}$ ) | $V_{\text{meso.}}$<br>( $\text{cm}^3/\text{g}$ ) |
|--------------------------|-----------------------------------------------|--------------------------------------------------|--------------------------------------------------|---------------------------------------------------|-------------------------------------------------|--------------------------------------------------|
| HP-U(Ce)-NH <sub>2</sub> | 410.15                                        | 1.039                                            | 133.96                                           | 0.127                                             | 276.19                                          | 0.912                                            |
| HP-U(Ce)-H               | 1344.95                                       | 0.998                                            | 876.08                                           | 0.377                                             | 468.87                                          | 0.621                                            |
| HP-U(Ce)-NO <sub>2</sub> | 1088.12                                       | 1.068                                            | 570.18                                           | 0.256                                             | 517.94                                          | 0.812                                            |
| Micro-U(Ce)-Br           | 581.66                                        | 0.401                                            | 410.38                                           | 0.190                                             | 171.28                                          | 0.211                                            |
| HP-U(Ce)-Br (10-0)       | 704.68                                        | 0.618                                            | 429.62                                           | 0.190                                             | 275.06                                          | 0.428                                            |
| HP-U(Ce)-Br-9-1          | 728.71                                        | 0.648                                            | 412.31                                           | 0.183                                             | 316.40                                          | 0.465                                            |
| HP-U(Ce)-Br-8-2          | 691.08                                        | 0.611                                            | 409.54                                           | 0.187                                             | 281.54                                          | 0.424                                            |
| HP-U(Ce)-Br-7-3          | 637.09                                        | 0.640                                            | 315.97                                           | 0.154                                             | 321.12                                          | 0.486                                            |
| HP-U(Ce)-Br-6-4          | 621.69                                        | 0.641                                            | 282.22                                           | 0.134                                             | 339.47                                          | 0.507                                            |
| 4Ni/HP-U(Ce)-Br-6-4      | 233.42                                        | 0.311                                            | 53.02                                            | 0.029                                             | 180.40                                          | 0.282                                            |

$A_{\text{BET}}$  is the Brunauer-Emmett-Teller (BET) specific surface area

$V_{\text{total}}$  is the total pore volume calculated by the single point adsorption at  $P/P_0 = 0.99$

$A_{\text{micro.}}$  is the specific micropore surface area calculated by t-plot analysis

$V_{\text{micro.}}$  is the micropore volume calculated by t-plot analysis

$A_{\text{meso.}}$  is the specific mesopore surface area estimated by subtracting  $A_{\text{micro.}}$  from  $A_{\text{BET}}$

$V_{\text{meso.}}$  is the mesopore volume estimated by subtracting  $V_{\text{micro.}}$  from  $V_{\text{total}}$

**Table S2.** XPS quantitative analysis of Ce 3d, O 1s, and Ni 2p derived from the area ratio of peaks.

| <b>Samples</b>                     | <b>Ce<sup>3+</sup>/(Ce<sup>4+</sup>+Ce<sup>3+</sup>)</b> | <b>O<sub>ads.</sub>/O<sub>total</sub></b> | <b>Ni<sup>0</sup>/(Ni<sup>0</sup>+Ni<sup>2+</sup>)</b> |
|------------------------------------|----------------------------------------------------------|-------------------------------------------|--------------------------------------------------------|
| <b>4Ni/HP-U(Ce)-NH<sub>2</sub></b> | 53.59%                                                   | 12.92%                                    | 12.70%                                                 |
| <b>4Ni/HP-U(Ce)-H</b>              | 30.99%                                                   | 12.45%                                    | 22.53%                                                 |
| <b>4Ni/HP-U(Ce)-NO<sub>2</sub></b> | 42.94%                                                   | 13.85%                                    | 15.33%                                                 |
| <b>4Ni/HP-U(Ce)-Br (10-0)</b>      | 36.78%                                                   | 10.98%                                    | 25.17%                                                 |
| <b>4Ni/HP-U(Ce)-Br-9-1</b>         | 36.43%                                                   | 12.07%                                    | 24.49%                                                 |
| <b>4Ni/HP-U(Ce)-Br-8-2</b>         | 40.13%                                                   | 12.33%                                    | 28.88%                                                 |
| <b>4Ni/HP-U(Ce)-Br-7-3</b>         | 41.70%                                                   | 11.87%                                    | 34.31%                                                 |
| <b>4Ni/HP-U(Ce)-Br-6-4</b>         | 44.52%                                                   | 10.56%                                    | 27.60%                                                 |
| <b>4Ni/Micro-U(Ce)-Br</b>          | 36.83%                                                   | 12.25%                                    | 24.76%                                                 |
| <b>HP-U(Ce)-Br-10-0</b>            | 35.02%                                                   | 11.43%                                    | -                                                      |
| <b>HP-U(Ce)-Br-9-1</b>             | 36.14%                                                   | 12.49%                                    | -                                                      |
| <b>HP-U(Ce)-Br-8-2</b>             | 38.01%                                                   | 14.33%                                    | -                                                      |
| <b>HP-U(Ce)-Br-7-3</b>             | 35.71%                                                   | 13.87%                                    | -                                                      |
| <b>HP-U(Ce)-Br-6-4</b>             | 31.54%                                                   | 11.83%                                    | -                                                      |
| <b>Micro-U(Ce)-Br</b>              | 30.32%                                                   | 12.79%                                    | -                                                      |

**Table S3.** Ni content of catalysts from ICP-MS results.

| <b>Catalysts</b>             | <b>Theoretical loading<br/>(wt.%)</b> | <b>Experimental loading<br/>(wt.%)</b> |
|------------------------------|---------------------------------------|----------------------------------------|
| 4Ni/HP-U(Ce)-NH <sub>2</sub> | 4                                     | 4.123                                  |
| 4Ni/HP-U(Ce)-H               | 4                                     | 3.867                                  |
| 4Ni/HP-U(Ce)-NO <sub>2</sub> | 4                                     | 3.947                                  |
| 4Ni/HP-U(Ce)-Br (10-0)       | 4                                     | 3.817                                  |
| 4Ni/HP-U(Ce)-Br-9-1          | 4                                     | 3.578                                  |
| 4Ni/HP-U(Ce)-Br-8-2          | 4                                     | 3.826                                  |
| 4Ni/HP-U(Ce)-Br-7-3          | 4                                     | 4.069                                  |
| 4Ni/HP-U(Ce)-Br-6-4          | 4                                     | 3.912                                  |
| 4Ni/HP-U(Ce)-Br-6-4-cycle    | 4                                     | 3.663                                  |
| 1Ni/HP-U(Ce)-Br-6-4          | 1                                     | 1.028                                  |
| 2Ni/HP-U(Ce)-Br-6-4          | 2                                     | 2.152                                  |
| 3Ni/HP-U(Ce)-Br-6-4          | 3                                     | 3.395                                  |
| 5Ni/HP-U(Ce)-Br-6-4          | 5                                     | 5.917                                  |
| 4Ni/Micro-U(Ce)-Br           | 4                                     | 3.968                                  |

**Table S4.** DCPD hydrogenation performance of the reported catalysts.

| Catalysts                                             | Hydrogenation conditions                         | DCPD Conversion (%) | THDCPD Selectivity (%) | References |
|-------------------------------------------------------|--------------------------------------------------|---------------------|------------------------|------------|
| Ni-NSs@MSNSs                                          | 150 °C, 2.5 MPa, 2 h                             | >99.5               | 98.9                   | 1          |
| NiMo <sub>0.2</sub> /γ-Al <sub>2</sub> O <sub>3</sub> | 150 °C, 3.5 MPa, 3 h                             | 97                  | 99.7                   | 2          |
| Ni/SBA-15                                             | 130 °C, 2 MPa, 5 h                               | 70                  | 74.8                   | 3          |
| SiO <sub>2</sub> @Ni/C                                | 60-90 °C, 3 MPa, WHSV= 2 h <sup>-1</sup> , 144 h | 100                 | >90                    | 4          |
| Ni@C/g-C <sub>3</sub> N <sub>4</sub>                  | 30 °C, 0.1 MPa, 2 h                              | >99.9               | >99.9                  | 5          |
| NiM-2                                                 | 60 °C, 3 MPa, 0.5 h                              | 100                 | 99.1                   | 6          |
| Ni-53-500                                             | 60°C, 3MPa, 2 h                                  | 100                 | >98                    | 7          |
| MET-1000                                              | 120 °C, 3 MPa, 12 h                              | 100                 | >99.9                  | 8          |
| Ru@Meso-UiO-25-200                                    | 60 °C, 2 MPa, 0.58 h                             | 100                 | ~100                   | 9          |
| Ru <sub>1</sub> Ni <sub>1.5</sub> @UiO-66(Ce)-12 h    | 35 °C, 1 MPa, 0.42 h                             | 100                 | ~100                   | 10         |
| Pt NCs@Ce-PyDC-3                                      | 50 °C, 1 MPa, 1 h                                | 100                 | 99                     | 11         |
| Pd/UiO-67(Ce)-bpy                                     | 70 °C, 1 MPa, 1 h                                | >99                 | 96.4                   | 12         |
| Ir@Ce-UiO-66-NO <sub>2</sub>                          | 70 °C, 2 MPa, 2 h                                | 100                 | >99                    | 13         |
| Ni/La NPs@UD                                          | 70 °C, 1 MPa, 1.5 h                              | 100                 | 99.9                   | 14         |
| Ni <sub>5</sub> @U(Ce)-40eq-5                         | 70 °C, 2 MPa, 1.5 h                              | 100                 | 100                    | 15         |
| 3Ni/HP-UiO-66                                         | 100 °C, 2 MPa, 1 h                               | 100                 | >99.9                  | 16         |
| 5Ni/Ce-UiO-2HAc                                       | 100 °C, 2 MPa, 0.83 h                            | 100                 | ~100                   | 17         |
| Ni/Ce-UiO-66-Br                                       | 100 °C, 2 MPa, 3 h                               | 100                 | 100                    | 18         |
| 4Ni/HP-U(Ce)-Br-6-4                                   | 60 °C, 2 MPa, 0.5 h                              | 100                 | 95                     | This work  |
|                                                       | 70 °C, 2 MPa, 0.5 h                              | 100                 | ~100                   |            |

**Table S5.** H<sub>2</sub>-TPD data of the catalysts.

| <b>Catalysts</b>            | <b>Total adsorption quantity of H<sub>2</sub><br/>(mmol/g)</b> | <b>Peak concentration (%)</b> |
|-----------------------------|----------------------------------------------------------------|-------------------------------|
| <b>1Ni/HP-U(Ce)-Br-6-4</b>  | 0.2852                                                         | 0.04                          |
| <b>2Ni/HP-U(Ce)-Br-6-4</b>  | 0.3166                                                         | 0.05                          |
| <b>3Ni/HP-U(Ce)-Br-6-4</b>  | 0.3345                                                         | 0.05                          |
| <b>4Ni/HP-U(Ce)-Br-6-4</b>  | 0.4287                                                         | 0.06                          |
| <b>5Ni/HP-U(Ce)-Br-6-4</b>  | 0.3814                                                         | 0.08                          |
| <b>4Ni/HP-U(Ce)-Br-10-0</b> | 0.4385                                                         | 0.08                          |
| <b>4Ni/HP-U(Ce)-Br-9-1</b>  | 0.4488                                                         | 0.08                          |
| <b>4Ni/HP-U(Ce)-Br-8-2</b>  | 0.4361                                                         | 0.09                          |
| <b>4Ni/HP-U(Ce)-Br-7-3</b>  | 0.4059                                                         | 0.09                          |
| <b>4Ni/Micro-U(Ce)-Br</b>   | 0.3141                                                         | 0.07                          |

## References

- 1 X. Gao, H. Zhang, J. Guan, D. Shi, Q. Wu, K.-c. Chen, Y. Zhang, C. Feng, Y. Zhao, Q. Jiao and H. Li, *ACS Omega*, 2021, **6**, 11570-11584. <https://doi.org/10.1021/acsomega.1c00779>
- 2 Z. Fang, D. Shi, N. Lin, A. Li, Q. Wu, Q. Wang, Y. Zhao, C. Feng, Q. Jiao and H. Li, *Appl. Catal. A-Gen.*, 2019, **574**, 60-70. <https://doi.org/10.1016/j.apcata.2019.01.026>
- 3 P. Tamizhdurai, A. Ramesh, P. S. Krishnan, V. L. Mangesh, S. Umasankar, S. Narayanan, C. Ragupathi and K. Shanthi, *Microporous Mesoporous Mater.*, 2019, **290**, 109678. <https://doi.org/10.1016/j.micromeso.2019.109678>
- 4 D. Jia, J. Zhao, R. Yan, H. Gao, Z. Fu, Z. Zhu and Z. Tao, *Energy Fuels*, 2024, **38**, 12625-12631. <https://doi.org/10.1021/acs.energyfuels.4c01644>
- 5 C. Wu, X. Chen, J. Liang, J. Fu, Z. Zhang, X. Wei and L. Wang, *Chem. Eng. J.*, 2023, **462**, 142141. <https://doi.org/10.1016/j.cej.2023.142141>
- 6 J. Zhang, T. Wang, C. Shi, L. Pan, X. Zhang, C. Peng and J.-J. Zou, *Chem. Eng. J.*, 2023, **470**, 144197. <https://doi.org/10.1016/j.cej.2023.144197>
- 7 Y. Li, D. Jia, Z. Tao and J. Zhao, *RSC Adv.*, 2022, **12**, 9044-9050. <https://doi.org/10.1039/d2ra00238h>
- 8 D. Jia, J. Zhao, Z. Tao, H. Gao, Z. Fu, R. Yan, Z. Zhu, X. Shu and G. Wang, *Carbon*, 2021, **184**, 855-863. <https://doi.org/10.1016/j.carbon.2021.09.002>
- 9 R. Li, L. Wang, P. Zhou, J. Lin, Z. Liu, J. Chen, D. Zhao, X. Huang, Z. Tao and G. Wang, *Chin. J. Catal.*, 2024, **56**, 150-165. [https://doi.org/10.1016/s1872-2067\(23\)64562-0](https://doi.org/10.1016/s1872-2067(23)64562-0)
- 10 R. Li, T. Ban, D. Zhao, J. Lin, Z. Liu, L. Wang, X. Huang, Z. Tao and G. Wang, *Nano Res.*, 2024, **17**, 9550-9563. <https://doi.org/10.1007/s12274-024-6954-1>
- 11 Z. Liu, L. Wang, C. Wang, R. Li, P. Zhou, H. Gao and G. Wang, *Chem. Eng. J.*, 2024, **479**, 147601. <https://doi.org/10.1016/j.cej.2023.147601>
- 12 Z. Liu, C. Wang, P. Yang, W. Wang, H. Gao, G. An, S. Liu, J. Chen, T. Guo, X. Xu and G. Wang, *Chin. J. Catal.*, 2024, **64**, 112-122. [https://doi.org/10.1016/s1872-2067\(24\)60095-1](https://doi.org/10.1016/s1872-2067(24)60095-1)
- 13 T. Ban, L. Yu, R. Li, C. Wang, J. Lin, J. Chen, X. Xu, Z. Wang, H. Gao and G. Wang, *Carbon Neutralization*, 2025, **4**, e70004. <https://doi.org/10.1002/cnl2.70004>
- 14 Z. Liu, Y. Gao, C. Wang, Y. Zhang, H. Gao, P. Yang, S. Liu, J. Chen, Z. Liu, J. Wang, X. Xu and G. Wang, *Chem. Eng. J.*, 2025, **512**, 162497. <https://doi.org/10.1016/j.cej.2025.162497>

- 15 R. Li, T. Ban, D. Zhao, F. Hu, J. Lin, X. Huang, Z. Tao and G. Wang, *Chin. J. Catal.*, 2025, **72**, 344-358. [https://doi.org/10.1016/s1872-2067\(24\)60284-6](https://doi.org/10.1016/s1872-2067(24)60284-6)
- 16 F. Hu, R. Li, D. Zhao, X. Huang and G. Wang, *Appl. Surf. Sci.*, 2025, **697**, 163022. <https://doi.org/10.1016/j.apsusc.2025.163022>
- 17 F. Hu, D. Zhao, R. Li, Y. Zhang, T. Zhang, X. Huang and G. Wang, *J. Mater. Chem. A*, 2025, **13**, 11874-11885. <https://doi.org/10.1039/d5ta00599j>
- 18 T. Li, J. Chen, D. Jia, S. Zhou, T. Ban, S. Cheng, A. Li and H. Gao, *Mater. Today Chem.*, 2025, **43**, 102521. <https://doi.org/10.1016/j.mtchem.2025.102521>
